# Supplementary material
Source: publisher site journal article supplement (https://www.dovepress.com/article/356551)
Supplement: Supplementary file 1 [file get_supplementary_file.php]

Figure S1. The correlation of SBDGs in rosacea.

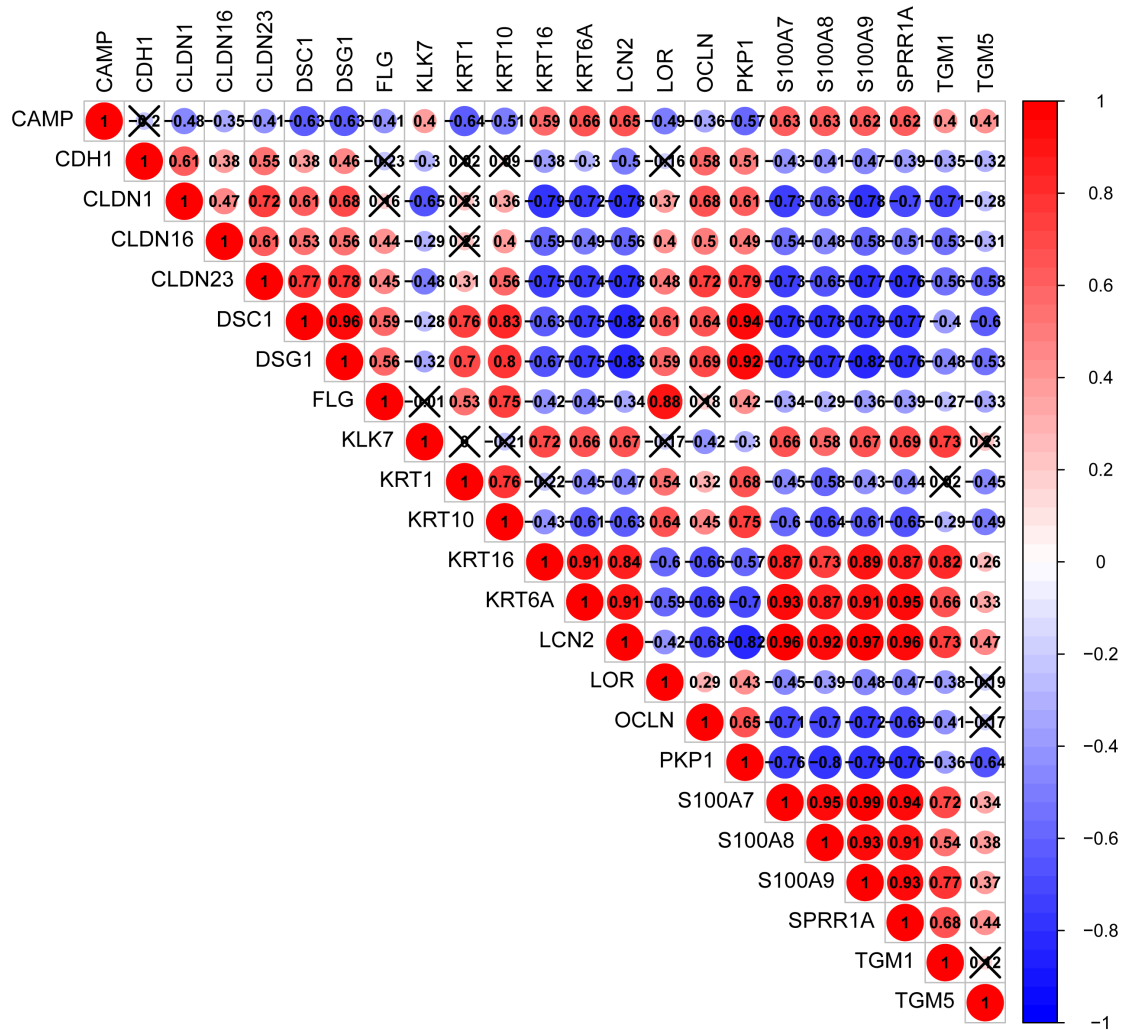

Figure S2. The immune cells in different subtypes of rosacea.

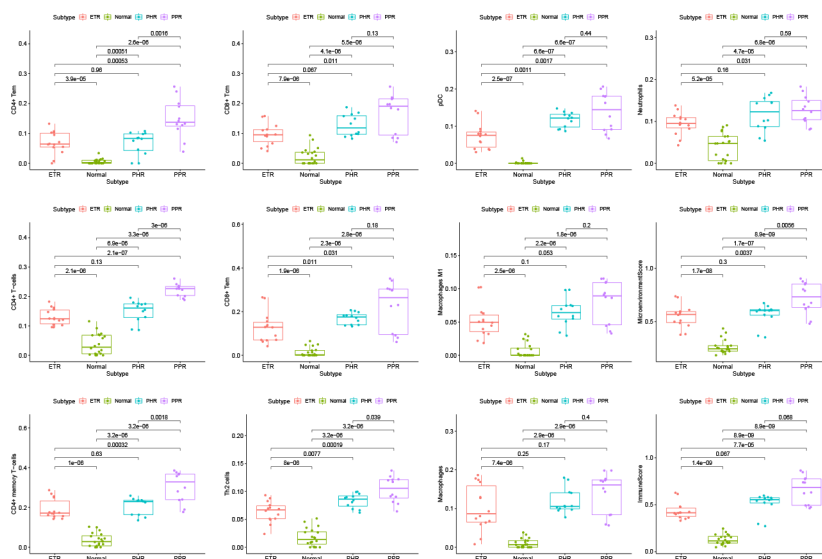

Figure S3. The 3 hub genes expression in rosacea was verified in Shih's study and epidermal transcriptome data.

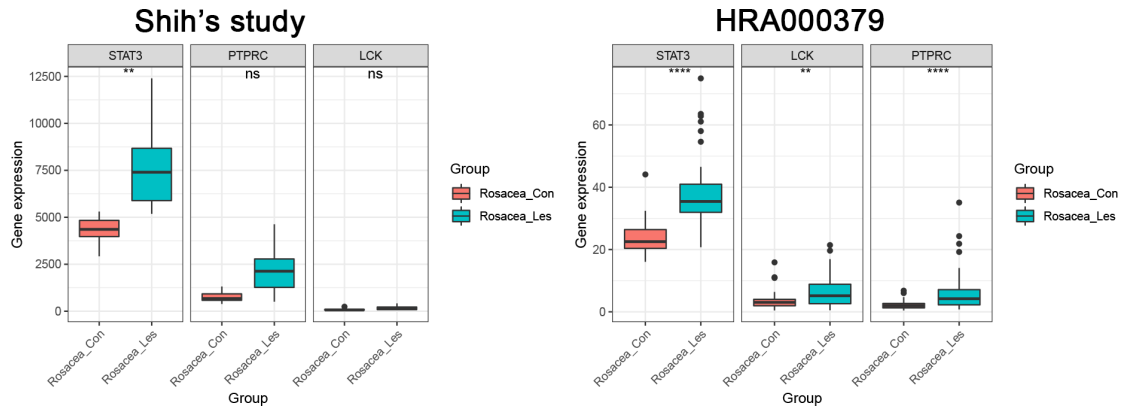

Figure S4. The expression and enrichment of STAT3-related genes in lightgreen. A, The expression of STAT3-related genes in rosacea and normal tissues. B, The expression of genes in 3 SBDs clusters. C, The heatmap of STAT3-related genes in 3 SBDs clusters. The enrichment of STAT3-related genes.

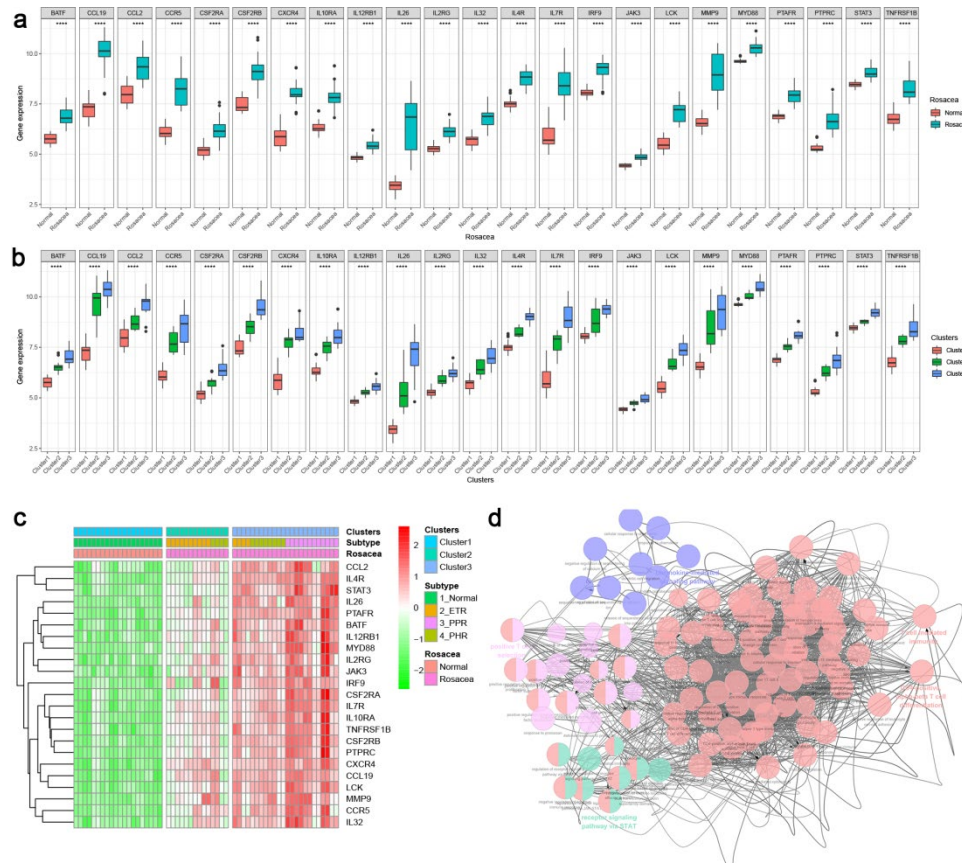

Figure S5. The KEGG analysis of genes from 3 subnetworks.

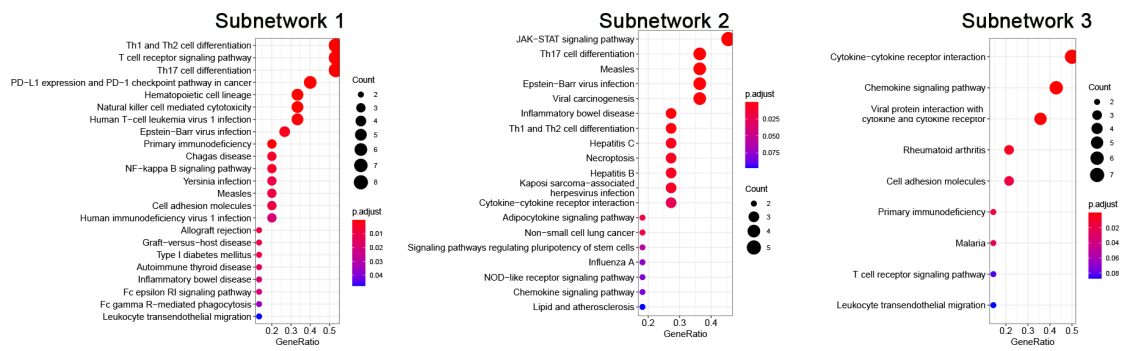

Figure S6. The correlation of SBDGs and rosacea related genes.

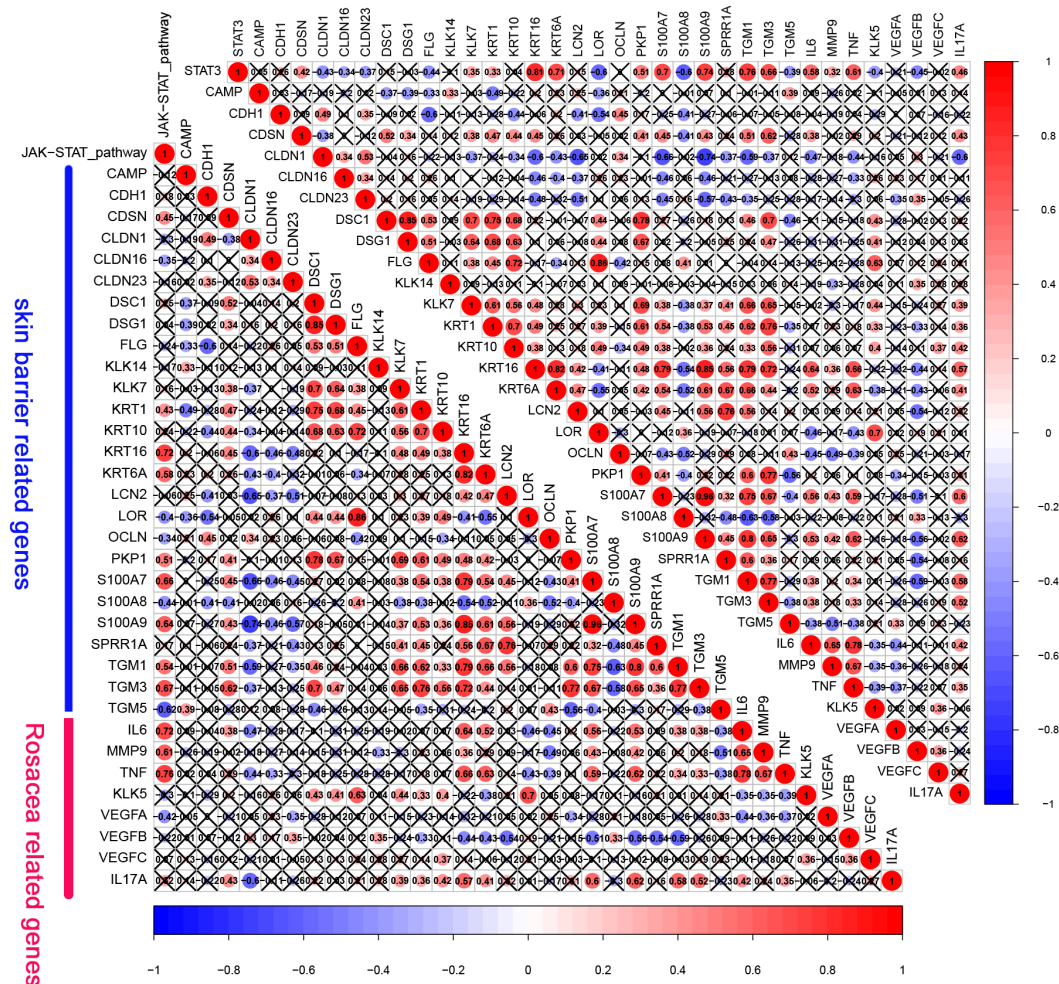

Figure S7. The ven of predicted drugs using STAT3-related genes and SBD pattern-related genes.

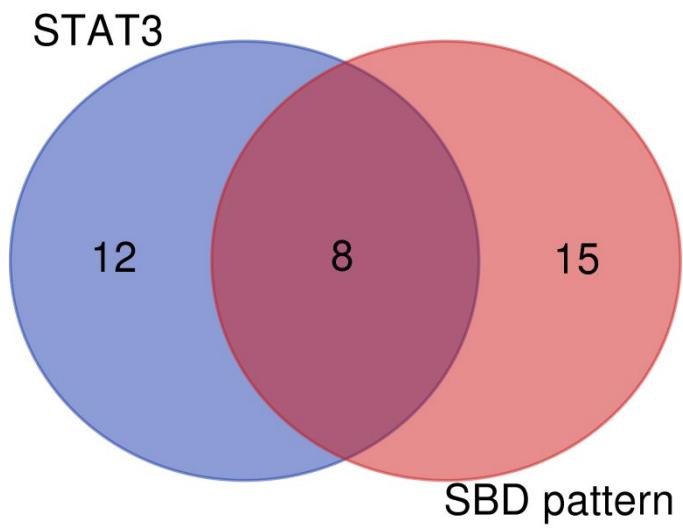













|    |                                                               |        |           |           |          |          |                                                                      |    |
|----|---------------------------------------------------------------|--------|-----------|-----------|----------|----------|----------------------------------------------------------------------|----|
| MF | GO:0079492 oligosaccharide binding                            | 3/412  | 15/18352  | 0.004181  | 0.036105 | 0.029471 | SELE/SELL/SELP                                                       | 3  |
| MF | GO:0015026 coreceptor activity                                | 5/412  | 48/18352  | 0.004312  | 0.03687  | 0.029945 | CXCR6/Y95TGA/CCR5/CD86                                               | 5  |
| MF | GO:0043177 organic acid binding                               | 12/412 | 224/18352 | 0.00485   | 0.04278  | 0.032877 | SUGAP/ABPS/TCD3/CHAMP/SELE/GLUL/SELP/ALOX5AP/ST8SI44/VCA/PCN1/SGLT10 | 12 |
| MF | GO:0005126 tumor necrosis factor receptor binding             | 4/412  | 31/18352  | 0.0048763 | 0.04278  | 0.032877 | TNFR/TFN3/CD275/TNFRSF10B                                            | 4  |
| MF | GO:0018783 transferase activity, transferring pentosyl groups | 5/412  | 50/18352  | 0.005145  | 0.041895 | 0.034197 | PNP/TFM/NAIMP/APP1/PABP9                                             | 5  |
| MF | GO:0004601 peroxidase activity                                | 5/412  | 52/18352  | 0.0060863 | 0.04865  | 0.039678 | P/CEU/CPK2/PKCN/ALDOXAP/PTGS2                                        | 5  |





|    |                                                                                                                  |        |           |          |          |          |                                                                                        |    |
|----|------------------------------------------------------------------------------------------------------------------|--------|-----------|----------|----------|----------|----------------------------------------------------------------------------------------|----|
| BP | GO:0007584 response to nutrient                                                                                  | 8/207  | 171/18866 | 0.000613 | 0.016037 | 0.014352 | PKLR/AACS/PPARG/BCKDHB/HLCS/GNPAT/ACSL1/LEP                                            | 8  |
| BP | GO:0006084 acetyl-CoA metabolic process                                                                          | 4/207  | 39/18866  | 0.000776 | 0.019742 | 0.017668 | MPC2/ACSS2/PMVK/MVD                                                                    | 4  |
| BP | GO:0019433 triglyceride catabolic process                                                                        | 4/207  | 39/18866  | 0.000776 | 0.019742 | 0.017668 | PNPLA4/LIPH/PNPLA3/ABHD5                                                               | 4  |
| BP | GO:0030730 sequestering of triglyceride                                                                          | 3/207  | 17/18866  | 0.000790 | 0.019742 | 0.017668 | PPARG/FITM2/ABHD5                                                                      | 3  |
| BP | GO:0046459 short-chain fatty acid metabolic process                                                              | 3/207  | 17/18866  | 0.000790 | 0.019742 | 0.017668 | PHYH/ACSS2/CRAT                                                                        | 3  |
| BP | GO:0055089 fatty acid homeostasis                                                                                | 3/207  | 17/18866  | 0.000790 | 0.019742 | 0.017668 | APOE/GPAM/DGAT2                                                                        | 3  |
| BP | GO:0055090 acylglycerol homeostasis                                                                              | 4/207  | 39/18866  | 0.000857 | 0.021028 | 0.018818 | APOE/NR1H3/FITM2/DGAT2                                                                 | 4  |
| BP | GO:0070328 triglyceride homeostasis                                                                              | 4/207  | 39/18866  | 0.000857 | 0.021028 | 0.018818 | APOE/NR1H3/FITM2/DGAT2                                                                 | 4  |
| BP | GO:0035338 long-chain fatty-acyl-CoA biosynthetic process                                                        | 3/207  | 19/18866  | 0.001108 | 0.026940 | 0.024109 | ACSBG1/ACSL1/ELOVL3                                                                    | 3  |
| BP | GO:0010878 cholesterol storage                                                                                   | 3/207  | 20/18866  | 0.001293 | 0.030981 | 0.027725 | NR1H3/PPARG/SOAT1                                                                      | 3  |
| BP | GO:0044272 sulfur compound biosynthetic process                                                                  | 8/207  | 192/18866 | 0.001297 | 0.030981 | 0.027725 | GSTM3/MPC2/SCD/ACSS2/ACSBG1/OGN/ACSL1/ELOVL3                                           | 8  |
| BP | GO:0046503 glycerolipid catabolic process                                                                        | 5/207  | 74/18866  | 0.001321 | 0.031287 | 0.027999 | PNPLA4/LIPH/GDP1/PNPLA3/ABHD5                                                          | 5  |
| BP | GO:0006089 lipid transport                                                                                       | 12/207 | 393/18866 | 0.001385 | 0.032506 | 0.029093 | SLC27A6/SLC25A17/APOE/ABC1/3/NR1H3/RBP4/PPARG/AQP9/THRS/ACSL1/LEP/SOAT1                | 12 |
| BP | GO:0015909 long-chain fatty acid transport                                                                       | 5/207  | 75/18866  | 0.001403 | 0.032860 | 0.029227 | SLC27A6/APOE/PPARG/THRS/ACSL1                                                          | 5  |
| BP | GO:1901616 organic hydroxy compound catabolic process                                                            | 5/207  | 76/18866  | 0.001489 | 0.033959 | 0.03039  | CYP4F3/CYP27A1/GKS/APOE/CYP39A1                                                        | 5  |
| BP | GO:0043651 linoleic acid metabolic process                                                                       | 3/207  | 21/18866  | 0.001497 | 0.033959 | 0.03039  | ACSL1/ELOVL3/FA2D2                                                                     | 3  |
| BP | GO:2000738 positive regulation of stem cell differentiation                                                      | 3/207  | 21/18866  | 0.001497 | 0.033959 | 0.03039  | GATA6/FOXCL/RBM24                                                                      | 3  |
| BP | GO:0016101 diterpenoid metabolic process                                                                         | 6/207  | 114/18866 | 0.001620 | 0.036311 | 0.032495 | PNPLA4/APOE/PCER/RBP4/DGAT2/SRD5A1                                                     | 6  |
| BP | GO:0062012 regulation of small molecule metabolic process                                                        | 13/207 | 456/18866 | 0.001634 | 0.036311 | 0.032495 | RORC/APOE/NR1H3/GPAM/SCD/FDPS/DHCR7/PPARG/PMVK/INSIG1/MVD/DGAT2/LEP                    | 13 |
| BP | GO:0009150 purine ribonucleotide metabolic process                                                               | 12/207 | 401/18866 | 0.001640 | 0.036311 | 0.032495 | PKLR/MPC2/GPAM/SCD/ACSS2/PMVK/ACSBG1/ENO3/ACSL1/ELOVL3/MVD/DGAT2                       | 12 |
| BP | GO:0009083 branched-chain amino acid catabolic process                                                           | 3/207  | 22/18866  | 0.001719 | 0.037746 | 0.03378  | PPM1K/BCKDHB/HIBCH                                                                     | 3  |
| BP | GO:0046942 carboxylic acid transport                                                                             | 11/207 | 350/18866 | 0.001736 | 0.037819 | 0.033844 | SLC27A6/SLC1A6/SLC25A17/APOE/MPC2/SLC25A18/PPARG/AQP9/THRS/ACSL1/LEP                   | 11 |
| BP | GO:0015849 organic acid transport                                                                                | 11/207 | 353/18866 | 0.001856 | 0.039949 | 0.035751 | SLC27A6/SLC1A6/SLC25A17/APOE/MPC2/SLC25A18/PPARG/AQP9/THRS/ACSL1/LEP                   | 11 |
| BP | GO:0046401 neutral lipid catabolic process                                                                       | 4/207  | 48/18866  | 0.001878 | 0.039949 | 0.035751 | PNPLA4/LIPH/PNPLA3/ABHD5                                                               | 4  |
| BP | GO:0046454 acylglycerol catabolic process                                                                        | 4/207  | 48/18866  | 0.001878 | 0.039949 | 0.035751 | PNPLA4/LIPH/PNPLA3/ABHD5                                                               | 4  |
| BP | GO:0034284 response to monosaccharide                                                                            | 8/207  | 207/18866 | 0.002083 | 0.043971 | 0.03935  | CTS/PKLR/MPC2/GPAM/AACS/CPB2/ACV1/CLP                                                  | 8  |
| BP | GO:0090208 positive regulation of triglyceride metabolic process                                                 | 3/207  | 24/18866  | 0.002223 | 0.046226 | 0.041369 | NR1H3/ABHD5/DGAT2                                                                      | 3  |
| BP | GO:0009259 ribonucleotide metabolic process                                                                      | 12/207 | 416/18866 | 0.002224 | 0.046226 | 0.041369 | PKLR/MPC2/GPAM/SCD/ACSS2/PMVK/ACSBG1/ENO3/ACSL1/ELOVL3/MVD/DGAT2                       | 12 |
| CC | GO:0005777 peroxisome                                                                                            | 12/215 | 137/19559 | 3.81E-08 | 4.80E-06 | 4.50E-06 | PHYH/ISOC1/SLC25A17/HACL1/PEX11A/HAO2/PCER/PXMP2/PMVK/CRAT/GNPAT/ACSL1                 | 12 |
| CC | GO:0042579 microbody                                                                                             | 12/215 | 137/19559 | 3.81E-08 | 4.80E-06 | 4.50E-06 | PHYH/ISOC1/SLC25A17/HACL1/PEX11A/HAO2/PCER/PXMP2/PMVK/CRAT/GNPAT/ACSL1                 | 12 |
| CC | GO:0005778 peroxisomal membrane                                                                                  | 6/215  | 60/19559  | 5.02E-05 | 0.003164 | 0.00296  | SLC25A17/PEX11A/PCER/PXMP2/GNPAT/ACSL1                                                 | 6  |
| CC | GO:0031903 microbody membrane                                                                                    | 6/215  | 60/19559  | 5.02E-05 | 0.003164 | 0.00296  | SLC25A17/PEX11A/PCER/PXMP2/GNPAT/ACSL1                                                 | 6  |
| CC | GO:0005782 peroxisomal matrix                                                                                    | 5/215  | 52/19559  | 0.000262 | 0.010986 | 0.010279 | PHYH/HACL1/HAO2/CRAT/GNPAT                                                             | 5  |
| CC | GO:0031907 microbody lumen                                                                                       | 5/215  | 52/19559  | 0.000262 | 0.010986 | 0.010279 | PHYH/HACL1/HAO2/CRAT/GNPAT                                                             | 5  |
| CC | GO:0005811 lipid droplet                                                                                         | 6/215  | 93/19559  | 0.000566 | 0.020386 | 0.019075 | PNPLA4/PLIN4/PLIN1/PNPLA3/ABHD5/DGAT2                                                  | 6  |
| MF | GO:0003374 O-acyltransferase activity                                                                            | 11/205 | 50/18352  | 6.59E-12 | 2.96E-09 | 2.50E-09 | AGPAT1/GPAM/AGPAT3/PNPLA3/MOGAT2/CRAT/ABHD5/GNPAT/DGAT2/AWAT1/SOAT1                    | 11 |
| MF | GO:0016411 acylglycerol O-acyltransferase activity                                                               | 6/205  | 23/18352  | 1.58E-07 | 3.38E-05 | 2.95E-05 | AGPAT1/AGPAT3/PNPLA3/MOGAT2/ABHD5/DGAT2                                                | 6  |
| MF | GO:0016747 transferase activity, transferring acyl groups other than amino-acyl groups                           | 14/205 | 229/18352 | 3.07E-07 | 3.74E-05 | 3.27E-05 | AGPAT1/GPAM/ACAT2/CERS4/AGPAT3/PNPLA3/MOGAT2/CRAT/ABHD5/GNPAT/ELOVL3/DGAT2/AWAT1/SOAT1 | 14 |
| MF | GO:0016405 CoA-ligase activity                                                                                   | 6/205  | 26/18352  | 3.45E-07 | 3.74E-05 | 3.27E-05 | SLC27A6/ACSS3/AACS/ACSS2/ACSBG1/ACSL1                                                  | 6  |
| MF | GO:0016878 acid-thiol ligase activity                                                                            | 6/205  | 36/18352  | 8.57E-07 | 7.74E-05 | 6.50E-05 | SLC27A6/ACSS3/AACS/ACSS2/ACSBG1/ACSL1                                                  | 6  |
| MF | GO:0016746 transferase activity, transferring acyl groups                                                        | 14/205 | 259/18352 | 1.35E-06 | 9.73E-05 | 8.50E-05 | AGPAT1/GPAM/ACAT2/CERS4/AGPAT3/PNPLA3/MOGAT2/CRAT/ABHD5/GNPAT/ELOVL3/DGAT2/AWAT1/SOAT1 | 14 |
| MF | GO:0016877 ligase activity, forming carbon-sulfur bonds                                                          | 6/205  | 40/18352  | 5.05E-06 | 0.000313 | 0.000273 | SLC27A6/ACSS3/AACS/ACSS2/ACSBG1/ACSL1                                                  | 6  |
| MF | GO:0016628 oxidoreductase activity, acting on the CH-CH group of donors, NAD or NADP as acceptor                 | 5/205  | 26/18352  | 9.00E-06 | 0.000488 | 0.000426 | PCER/DHCR7/DHCR24/SRD5A1/MECR                                                          | 5  |
| MF | GO:0003841 L-acylglycerol-3-phosphate O-acyltransferase activity                                                 | 4/205  | 15/18352  | 1.87E-05 | 0.000904 | 0.000789 | AGPAT1/AGPAT3/PNPLA3/ABHD5                                                             | 4  |
| MF | GO:0042171 lysophosphatidic acid acyltransferase activity                                                        | 4/205  | 17/18352  | 3.21E-05 | 0.001393 | 0.001217 | AGPAT1/AGPAT3/PNPLA3/ABHD5                                                             | 4  |
| MF | GO:0016627 oxidoreductase activity, acting on the CH-CH group of donors                                          | 6/205  | 59/18352  | 4.97E-05 | 0.001888 | 0.001623 | PCER/DHCR7/DHCR24/CRAT/SRD5A1/MECR                                                     | 6  |
| MF | GO:0071617 lysophospholipid acyltransferase activity                                                             | 4/205  | 19/18352  | 5.14E-05 | 0.001888 | 0.001623 | AGPAT1/AGPAT3/PNPLA3/ABHD5                                                             | 4  |
| MF | GO:0016705 oxidoreductase activity, acting on paired donors, with incorporation or reduction of molecular oxygen | 9/205  | 162/18352 | 8.80E-05 | 0.002930 | 0.002565 | PHYH/CYP4F3/CYP27A1/SCD/CYP39A1/NLRRP11/HEATR4/MSMO1/FA2D2                             | 9  |
| MF | GO:0005496 steroid binding                                                                                       | 7/205  | 106/18352 | 0.000188 | 0.005815 | 0.006077 | PGRMC2/NR3C2/RORC/NR1H3/PGRMC1/INSIG1/SOAT1                                            | 7  |
| MF | GO:0004467 long-chain fatty acid-CoA ligase activity                                                             | 3/205  | 13/18352  | 0.000362 | 0.010485 | 0.009138 | SLC27A6/ACSBG1/ACSL1                                                                   | 3  |
| MF | GO:0016874 ligase activity                                                                                       | 8/205  | 165/18352 | 0.000543 | 0.014734 | 0.012865 | SLC27A6/ACSS3/TLL7/AACS/ACSS2/HLCS/ACSBG1/ACSL1                                        | 8  |
| MF | GO:0020037 heme binding                                                                                          | 7/205  | 138/18352 | 0.000924 | 0.022874 | 0.019973 | PGRMC2/CYP4F3/CYP27A1/CYB5A/FA2H/CYP39A1/PGRMC1                                        | 7  |
| MF | GO:0004497 monoxygenase activity                                                                                 | 6/205  | 101/18352 | 0.000949 | 0.022874 | 0.019973 | CYP4F3/CYP27A1/CYP39A1/NLRRP11/HEATR4/MSMO1                                            | 6  |
| MF | GO:0032218 amide binding                                                                                         | 12/205 | 381/18352 | 0.001236 | 0.028233 | 0.024652 | GHR/CRYAB/CTS/APOE/GSTM3/PGRMC1/DHCR24/PPARG/HLCS/PNPLA3/SRD5A1/SOAT1                  | 12 |
| MF | GO:0046906 tetrapyrrole binding                                                                                  | 7/205  | 148/18352 | 0.001389 | 0.030134 | 0.026312 | PGRMC2/CYP4F3/CYP27A1/CYB5A/FA2H/CYP39A1/PGRMC1                                        | 7  |
| MF | GO:0005506 iron ion binding                                                                                      | 7/205  | 151/18352 | 0.001559 | 0.032211 | 0.028125 | PHYH/CYP4F3/CYP27A1/SCD/FA2H/CYP39A1/MSMO1                                             | 7  |
| MF | GO:0015645 fatty acid ligase activity                                                                            | 3/205  | 22/18352  | 0.001809 | 0.035678 | 0.031152 | SLC27A6/ACSBG1/ACSL1                                                                   | 3  |
| MF | GO:0004879 nuclear receptor activity                                                                             | 4/205  | 52/18352  | 0.002692 | 0.048086 | 0.04251  | NR3C2/RORC/NR1H3/PPARG                                                                 | 4  |
| MF | GO:0098531 ligand-activated transcription factor activity                                                        | 4/205  | 52/18352  | 0.002692 | 0.048086 | 0.04251  | NR3C2/RORC/NR1H3/PPARG                                                                 | 4  |

Table S4. The KEGG enrichment analysis of downregulated genes in cluster 3

| ID       | Description                                | GeneRatio | BgRatio  | pvalue   | p.adjust | qvalue   | geneID                                                           | Count |
|----------|--------------------------------------------|-----------|----------|----------|----------|----------|------------------------------------------------------------------|-------|
| hsa04146 | Peroxisome                                 | 11/112    | 82/8091  | 1.34E-08 | 2.36E-06 | 2.17E-06 | PHYH/SLC25A17/HACL1/PEX11A/HAO2/PECR/PXMP2/PMVK/CRAT/GNPAT/ACSL1 | 11    |
| hsa03320 | PPAR signaling pathway                     | 10/112    | 76/8091  | 7.65E-08 | 6.73E-06 | 6.20E-06 | SLC27A6/CYP27A1/NR1H3/PLIN4/SCD/PLIN1/PPARG/ACSBG1/ACSL1/FADS2   | 10    |
| hsa01212 | Fatty acid metabolism                      | 7/112     | 57/8091  | 1.21E-05 | 0.000707 | 0.000651 | SCD/ACAT2/ACSBG1/ACSL1/ELOVL3/FADS2/MECR                         | 7     |
| hsa00640 | Propanoate metabolism                      | 5/112     | 34/8091  | 9.39E-05 | 0.00413  | 0.003804 | ACSS3/ACAT2/ACSS2/BCKDHB/HIBCH                                   | 5     |
| hsa00100 | Steroid biosynthesis                       | 4/112     | 20/8091  | 0.000142 | 0.005001 | 0.004606 | DHCR7/DHCR24/MSMO1/SOAT1                                         | 4     |
| hsa00561 | Glycerolipid metabolism                    | 6/112     | 61/8091  | 0.000184 | 0.005279 | 0.004863 | AGPAT1/GPAM/AGPAT3/PNPLA3/MOGAT2/DGAT2                           | 6     |
| hsa00900 | Terpenoid backbone biosynthesis            | 4/112     | 22/8091  | 0.00021  | 0.005279 | 0.004863 | FDPS/ACAT2/PMVK/MVD                                              | 4     |
| hsa01200 | Carbon metabolism                          | 7/112     | 115/8091 | 0.001034 | 0.022755 | 0.020959 | PKLR/HAO2/ACAT2/FBP2/ACSS2/HIBCH/ENO3                            | 7     |
| hsa00061 | Fatty acid biosynthesis                    | 3/112     | 18/8091  | 0.001811 | 0.035411 | 0.032616 | ACSBG1/ACSL1/MECR                                                | 3     |
| hsa00071 | Fatty acid degradation                     | 4/112     | 43/8091  | 0.002834 | 0.045339 | 0.04176  | ECI1/ACAT2/ACSBG1/ACSL1                                          | 4     |
| hsa04975 | Fat digestion and absorption               | 4/112     | 43/8091  | 0.002834 | 0.045339 | 0.04176  | AGPAT1/ACAT2/MOGAT2/DGAT2                                        | 4     |
| hsa00280 | Valine, leucine and isoleucine degradation | 4/112     | 48/8091  | 0.004238 | 0.062154 | 0.057247 | ACAT2/AACS/BCKDHB/HIBCH                                          | 4     |
| hsa01040 | Biosynthesis of unsaturated fatty acids    | 3/112     | 27/8091  | 0.00593  | 0.080283 | 0.073945 | SCD/ELOVL3/FADS2                                                 | 3     |
| hsa00630 | Glyoxylate and dicarboxylate metabolism    | 3/112     | 30/8091  | 0.007988 | 0.100417 | 0.092489 | HAO2/ACAT2/ACSS2                                                 | 3     |
| hsa00410 | beta-Alanine metabolism                    | 3/112     | 31/8091  | 0.008756 | 0.102732 | 0.094622 | CNDP1/UPB1/HIBCH                                                 | 3     |
| hsa00010 | Glycolysis / Gluconeogenesis               | 4/112     | 67/8091  | 0.013668 | 0.150349 | 0.138479 | PKLR/FBP2/ACSS2/ENO3                                             | 4     |
| hsa00120 | Primary bile acid biosynthesis             | 2/112     | 17/8091  | 0.022555 | 0.233512 | 0.215076 | CYP27A1/CYP39A1                                                  | 2     |
| hsa00620 | Pyruvate metabolism                        | 3/112     | 47/8091  | 0.026942 | 0.263432 | 0.242635 | PKLR/ACAT2/ACSS2                                                 | 3     |
| hsa00600 | Sphingolipid metabolism                    | 3/112     | 49/8091  | 0.030014 | 0.27802  | 0.256071 | ACER1/PSAPL1/CERS4                                               | 3     |
| hsa04979 | Cholesterol metabolism                     | 3/112     | 50/8091  | 0.031616 | 0.27822  | 0.256255 | CYP27A1/APOE/SOAT1                                               | 3     |
| hsa04923 | Regulation of lipolysis in adipocytes      | 3/112     | 57/8091  | 0.044057 | 0.369239 | 0.340088 | CGA/PLIN1/ABHD5                                                  | 3     |
| hsa00564 | Glycerophospholipid metabolism             | 4/112     | 98/8091  | 0.046655 | 0.373237 | 0.343771 | AGPAT1/GPAM/AGPAT3/GNPAT                                         | 4     |
| hsa00062 | Fatty acid elongation                      | 2/112     | 27/8091  | 0.053247 | 0.407454 | 0.375287 | ELOVL3/MECR                                                      | 2     |
| hsa00650 | Butanoate metabolism                       | 2/112     | 28/8091  | 0.056837 | 0.416804 | 0.383899 | ACAT2/AACS                                                       | 2     |
| hsa04920 | Adipocytokine signaling pathway            | 3/112     | 69/8091  | 0.070161 | 0.493932 | 0.454937 | ACSBG1/ACSL1/LEP                                                 | 3     |

Table S5. The GO enrichment analysis of key genes in lightgreen

| Ontology ID | Description                                                                                                      | Count  |
|-------------|------------------------------------------------------------------------------------------------------------------|--------|
| GO:0042110  | cell activation                                                                                                  | 45/29  |
| GO:0017159  | leukocyte cell-cell adhesion                                                                                     | 34/208 |
| GO:0050865  | regulation of T cell activation                                                                                  | 33/218 |
| GO:0053212  | T cell chemotaxis                                                                                                | 30/208 |
| GO:0022405  | positive regulation of cell-cell adhesion                                                                        | 27/208 |
| GO:1903039  | positive regulation of leukocyte cell-cell adhesion                                                              | 25/208 |
| GO:0002699  | positive regulation of leukocyte activation                                                                      | 23/208 |
| GO:0014711  | regulation of cell-cell adhesion                                                                                 | 31/208 |
| GO:0050870  | positive regulation of T cell activation                                                                         | 30/208 |
| GO:0050887  | positive regulation of cell activation                                                                           | 30/208 |
| GO:1903031  | regulation of cell-cell adhesion                                                                                 | 27/208 |
| GO:0030088  | lymphocyte differentiation                                                                                       | 28/208 |
| GO:0050852  | T cell receptor signaling pathway                                                                                | 22/208 |
| GO:0050851  | antigen receptor-mediated signaling pathway                                                                      | 22/208 |
| GO:0015231  | positive regulation of lymphocyte activation                                                                     | 27/208 |
| GO:0045785  | positive regulation of cell adhesion                                                                             | 28/208 |
| GO:0002429  | immune response-activating cell surface receptor signaling pathway                                               | 29/208 |
| GO:0002753  | immune response-activating cell surface receptor signaling pathway                                               | 29/208 |
| GO:0007187  | leukocyte apoptotic process                                                                                      | 25/208 |
| GO:0046561  | lymphocyte proliferation                                                                                         | 15/208 |
| GO:0046631  | alpha-beta T cell lymphocyte                                                                                     | 16/208 |
| GO:0029284  | mononuclear cell proliferation                                                                                   | 18/208 |
| GO:0050670  | regulation of lymphocyte proliferation                                                                           | 21/208 |
| GO:0070661  | cell proliferation                                                                                               | 21/208 |
| GO:0022944  | regulation of mononuclear cell proliferation                                                                     | 18/208 |
| GO:0042098  | T cell proliferation                                                                                             | 17/208 |
| GO:0016017  | defense response to virus                                                                                        | 19/208 |
| GO:0002010  | negative regulation of leukocyte apoptotic process                                                               | 10/208 |
| GO:0046632  | alpha-beta T cell differentiation                                                                                | 13/208 |
| GO:0001819  | positive regulation of cytokine production                                                                       | 24/208 |
| GO:0002109  | positive regulation of leukocyte apoptotic process                                                               | 12/208 |
| GO:0070662  | positive regulation of leukocyte proliferation                                                                   | 15/208 |
| GO:0009619  | response to virus                                                                                                | 21/208 |
| GO:0042123  | regulation of T cell proliferation                                                                               | 15/208 |
| GO:0035711  | positive, alpha-beta T cell activation                                                                           | 12/208 |
| GO:0001895  | cell killing                                                                                                     | 15/208 |
| GO:0034341  | regulation of interferon-gamma                                                                                   | 16/208 |
| GO:0043637  | CD4-positive, alpha-beta T cell differentiation                                                                  | 11/208 |
| GO:0046633  | positive regulation of alpha-beta T cell activation                                                              | 11/208 |
| GO:0045058  | T cell selection                                                                                                 | 9/208  |
| GO:0050671  | positive regulation of lymphocyte proliferation                                                                  | 13/208 |
| GO:1902105  | regulation of leukocyte differentiation                                                                          | 13/208 |
| GO:0022945  | positive regulation of mononuclear cell proliferation                                                            | 13/208 |
| GO:0043368  | positive T cell selection                                                                                        | 13/208 |
| GO:1903708  | positive regulation of hemopoiesis                                                                               | 8/208  |
| GO:0006909  | phagocytosis                                                                                                     | 14/208 |
| GO:0002868  | negative regulation of immune system process                                                                     | 15/208 |
| GO:0046634  | regulation of alpha-beta T cell activation                                                                       | 11/208 |
| GO:0006325  | cell chemotaxis                                                                                                  | 11/208 |
| GO:0045580  | regulation of T cell differentiation                                                                             | 13/208 |
| GO:0070665  | positive regulation of leukocyte proliferation                                                                   | 13/208 |
| GO:0002691  | regulation of immune effector process                                                                            | 22/208 |
| GO:0045619  | regulation of lymphocyte differentiation                                                                         | 14/208 |
| GO:0042102  | positive regulation of T cell proliferation                                                                      | 11/208 |
| GO:1902107  | positive regulation of leukocyte differentiation                                                                 | 13/208 |
| GO:0002683  | regulation of response to biotic stimulus                                                                        | 14/208 |
| GO:0001909  | leukocyte mediated cytotoxicity                                                                                  | 11/208 |
| GO:1903708  | regulation of hemopoiesis                                                                                        | 22/208 |
| GO:0045680  | positive regulation of T cell differentiation                                                                    | 10/208 |
| GO:0002703  | regulation of leukocyte mediated immunity                                                                        | 14/208 |
| GO:200051   | positive regulation of CD4-positive, alpha-beta T cell activation                                                | 7/208  |
| GO:1909808  | response to chemokine                                                                                            | 10/208 |
| GO:1909869  | cellular response to chemokine                                                                                   | 10/208 |
| GO:0071346  | cellular response to interferon-gamma                                                                            | 13/208 |
| GO:0002449  | leukocyte mediated immunity                                                                                      | 11/208 |
| GO:0041133  | cell activation                                                                                                  | 17/208 |
| GO:0057717  | negative regulation of immune response                                                                           | 12/208 |
| GO:0045621  | positive regulation of lymphocyte differentiation                                                                | 11/208 |
| GO:0002723  | positive regulation of interferon-gamma-1 production                                                             | 8/208  |
| GO:0030592  | leukocyte chemotaxis                                                                                             | 10/208 |
| GO:0002286  | T cell activation involved in immune response                                                                    | 10/208 |
| GO:0022080  | regulation of tumor necrosis factor production                                                                   | 10/208 |
| GO:0029899  | regulation of B cell proliferation                                                                               | 8/208  |
| GO:0032652  | regulation of interferon-gamma-1 production                                                                      | 10/208 |
| GO:2000514  | regulation of CD4-positive, alpha-beta T cell activation                                                         | 8/208  |
| GO:1903535  | positive regulation of superfamily cytokine production                                                           | 10/208 |
| GO:0046637  | regulation of alpha-beta T cell differentiation                                                                  | 8/208  |
| GO:0070098  | chemokine-mediated signaling pathway                                                                             | 8/208  |
| GO:0002609  | interferon-gamma production                                                                                      | 10/208 |
| GO:0022640  | tumor necrosis factor production                                                                                 | 8/208  |
| GO:0002228  | natural killer cell mediated immunity                                                                            | 8/208  |
| GO:0036336  | dendritic cell migration                                                                                         | 10/208 |
| GO:0072076  | lymphocyte migration                                                                                             | 10/208 |
| GO:0051897  | positive regulation of protein kinase B signaling                                                                | 12/208 |
| GO:0006333  | interferon-gamma-mediated signaling pathway                                                                      | 8/208  |
| GO:0046635  | positive regulation of alpha-beta T cell differentiation                                                         | 8/208  |
| GO:0043371  | positive regulation of CD4-positive, alpha-beta T cell differentiation                                           | 8/208  |
| GO:0031341  | regulation of cell killing                                                                                       | 7/208  |
| GO:0071708  | tumor necrosis factor superfamily cytokine production                                                            | 10/208 |
| GO:0020585  | regulation of antigen receptor-mediated signaling pathway                                                        | 8/208  |
| GO:0043370  | regulation of CD4-positive, alpha-beta T cell differentiation                                                    | 7/208  |
| GO:0002612  | interleukin-1 production                                                                                         | 7/208  |
| GO:1990299  | neutrophil migration                                                                                             | 10/208 |
| GO:0048871  | chemotaxis of number of cells                                                                                    | 14/208 |
| GO:0006037  | type I interferon signaling pathway                                                                              | 9/208  |
| GO:0071357  | cellular response to type I interferon                                                                           | 9/208  |
| GO:0002283  | lymphocyte cell-cell adhesion involved in immune response                                                        | 12/208 |
| GO:0032651  | regulation of interleukin-1 beta production                                                                      | 9/208  |
| GO:0042100  | cell proliferation                                                                                               | 9/208  |
| GO:0019026  | viral life cycle                                                                                                 | 16/208 |
| GO:0070227  | lymphocyte apoptotic process                                                                                     | 8/208  |
| GO:0030439  | myeloid cell differentiation                                                                                     | 18/208 |
| GO:0003494  | response to type I interferon                                                                                    | 9/208  |
| GO:0045080  | regulation of immune response                                                                                    | 15/208 |
| GO:0032713  | positive regulation of interleukin-1 beta production                                                             | 17/208 |
| GO:0043312  | neutrophil degranulation                                                                                         | 19/208 |
| GO:0032622  | interleukin-2 production                                                                                         | 9/208  |
| GO:0032620  | neutrophil chemotaxis                                                                                            | 9/208  |
| GO:0002283  | neutrophil activation involved in immune response                                                                | 19/208 |
| GO:0002649  | regulation of interferon-gamma production                                                                        | 9/208  |
| GO:0002650  | regulation of interferon-gamma-1 production                                                                      | 7/208  |
| GO:0050853  | B cell receptor signaling pathway                                                                                | 10/208 |
| GO:0031295  | T cell costimulation                                                                                             | 7/208  |
| GO:0032611  | interleukin-1 beta production                                                                                    | 7/208  |
| GO:0032610  | interleukin-12 production                                                                                        | 7/208  |
| GO:0007204  | positive regulation of cytosolic calcium ion concentration                                                       | 15/208 |
| GO:0031294  | lymphocyte costimulation                                                                                         | 7/208  |
| GO:0002460  | immune response-based on somatic recombination of immune receptors built from immunoglobulin superfamily domains | 15/208 |
| GO:0032653  | regulation of interleukin-10 production                                                                          | 7/208  |
| GO:0042093  | T-helper cell differentiation                                                                                    | 7/208  |
| GO:0002265  | natural killer cell mediated cytotoxicity                                                                        | 7/208  |
| GO:0002486  | response to lipopolysaccharide                                                                                   | 15/208 |
| GO:0001776  | leukocyte homeostasis                                                                                            | 15/208 |
| GO:0002294  | CD4-positive, alpha-beta T cell differentiation involved in immune response                                      | 7/208  |
| GO:0002407  | dendritic cell chemotaxis                                                                                        | 5/208  |
| GO:0002287  | alpha-beta T cell activation involved in immune response                                                         | 7/208  |
| GO:0002293  | alpha-beta T cell differentiation involved in immune response                                                    | 7/208  |
| GO:0032613  | interleukin-10 production                                                                                        | 7/208  |
| GO:0031340  | positive regulation of defense response                                                                          | 7/208  |
| GO:0002695  | negative regulation of leukocyte activation                                                                      | 11/208 |
| GO:0097530  | granulocyte migration                                                                                            | 11/208 |
| GO:0002723  | positive regulation of interferon-gamma production                                                               | 7/208  |









Table S6. The KEGG enrichment analysis of key genes in lightgreen

| ID       | Description                                                   | GeneRatio | BgRatio  | pvalue   | p.adjust | qvalue   | geneID                                                                                                                                               | Count |
|----------|---------------------------------------------------------------|-----------|----------|----------|----------|----------|------------------------------------------------------------------------------------------------------------------------------------------------------|-------|
| hsa04060 | Cytokine-cytokine receptor interaction                        | 24/129    | 295/8091 | 2.83E-11 | 5.68E-09 | 4.11E-09 | IFNAR2/CX3CR1/CCL18/TNFRSF21/CSF2RA/CCL2/CXCL16/OSMR/IL2RG/CXCL13/IL32/CCR5/IL12RB1/CCR7/TNFRSF1B/IL10RA/CXCR6/CXCR4/CCL19/IL26/CSF2RB/IL7R/LTB/IL4R | 24    |
| hsa04659 | Th17 cell differentiation                                     | 13/129    | 108/8091 | 1.33E-08 | 1.33E-06 | 9.60E-07 | IL2RG/HLA-DRA/HLA-DMA/IL12RB1/JAK3/CD247/LAT/PRKQ/STAT3/CD3D/LCK/CD3G/IL4R                                                                           | 13    |
| hsa04658 | Th1 and Th2 cell differentiation                              | 12/129    | 92/8091  | 1.98E-08 | 1.33E-06 | 9.60E-07 | IL2RG/HLA-DRA/HLA-DMA/IL12RB1/JAK3/CD247/LAT/PRKQ/CD3D/LCK/CD3G/IL4R                                                                                 | 12    |
| hsa04062 | Chemokine signaling pathway                                   | 16/129    | 192/8091 | 5.50E-08 | 2.76E-06 | 2.00E-06 | PIK3CD/CX3CR1/CCL18/AVAV1/CCL2/CXCL16/CXCL13/CCR5/JAK3/CCR7/ITK/CXCR6/STAT3/CXCR4/CCL19/RAC2                                                         | 16    |
| hsa04660 | T cell receptor signaling pathway                             | 12/129    | 104/8091 | 8.03E-08 | 3.22E-06 | 2.32E-06 | PIK3CD/CTLA4/AVAV1/COS/ITK/CD247/LAT/PRKQ/PTPRC/CD3D/LCK/CD3G                                                                                        | 12    |
| hsa05340 | Primary immunodeficiency                                      | 8/129     | 38/8091  | 1.10E-07 | 3.22E-06 | 2.32E-06 | CITTA/COS/IL2RG/JAK3/PTPRC/CD3D/IL7R/LCK                                                                                                             | 8     |
| hsa05169 | Epstein-Barr virus infection                                  | 16/129    | 202/8091 | 1.12E-07 | 3.22E-06 | 2.32E-06 | IFNAR2/PIK3CD/IRF9/HLA-DRA/HLA-DMA/JAK3/BCL2L11/E2F3/MYD88/TRAFF3/CD247/ITGAL/IRF7/STAT3/CD3D/CD3G                                                   | 16    |
| hsa04650 | Natural killer cell mediated cytotoxicity                     | 13/129    | 131/8091 | 1.38E-07 | 3.47E-06 | 2.51E-06 | IFNAR2/PIK3CD/SH2D1A/MICB/HCST/VAV1/CD247/CD48/ITGAL/LAT/GZMB/LCK/RAC2                                                                               | 13    |
| hsa04061 | Viral protein interaction with cytokine and cytokine receptor | 11/129    | 100/8091 | 4.69E-07 | 1.05E-05 | 7.57E-06 | CX3CR1/CCL18/CCL2/IL2RG/CXCL13/CCR5/CCR7/TNFRSF1B/IL10RA/CXCR4/CCL19                                                                                 | 11    |
| hsa05235 | PD-L1 expression and PD-1 checkpoint pathway in cancer        | 10/129    | 89/8091  | 1.31E-06 | 2.63E-05 | 1.90E-05 | PIK3CD/MYD88/CD247/BATF/LAT/PRKQ/STAT3/CD3D/LCK/CD3G                                                                                                 | 10    |
| hsa04630 | JAK-STAT signaling pathway                                    | 13/129    | 162/8091 | 1.62E-06 | 2.96E-05 | 2.14E-05 | IFNAR2/PIK3CD/IRF9/CSF2RA/OSMR/IL2RG/IL12RB1/JAK3/IL10RA/STAT3/CSF2RB/IL7R/IL4R                                                                      | 13    |
| hsa05162 | Measles                                                       | 12/129    | 139/8091 | 1.93E-06 | 3.23E-05 | 2.34E-05 | IFNAR2/PIK3CD/IRF9/IL2RG/JAK3/MYD88/TRAFF3/IRF7/SLAMF1/STAT3/CD3D/CD3G                                                                               | 12    |
| hsa04621 | NOD-like receptor signaling pathway                           | 13/129    | 184/8091 | 6.70E-06 | 0.000104 | 7.49E-05 | IFNAR2/CARD6/IRF9/CCL2/IFI16/GSDMD/BIRC3/MYD88/TRAFF3/IRF7/AIM2/NAMPT/CYBA                                                                           | 13    |
| hsa04640 | Hematopoietic cell lineage                                    | 9/129     | 99/8091  | 2.60E-05 | 0.000373 | 0.00027  | CSF2RA/CD5/HLA-DRA/HLA-DMA/CD3D/CD2/IL7R/CD3G/IL4R                                                                                                   | 9     |
| hsa04670 | Leukocyte transendothelial migration                          | 9/129     | 114/8091 | 7.96E-05 | 0.001066 | 0.00077  | PIK3CD/AVAV1/MMP9/RHOH/ITK/ITGAL/CXCR4/RAC2/CYBA                                                                                                     | 9     |
| hsa04064 | NF-kappa B signaling pathway                                  | 8/129     | 104/8091 | 0.00024  | 0.003016 | 0.00218  | BIRC3/MYD88/TRAFF3/LAT/PRKQ/CCL19/LCK/LTB                                                                                                            | 8     |
| hsa04210 | Apoptosis                                                     | 9/129     | 136/8091 | 0.000306 | 0.003619 | 0.002615 | CTSF/PIK3CD/CTSL/PARP4/BIRC3/BCL2L11/GZMB/CSF2RB/CTSC                                                                                                | 9     |
| hsa05145 | Toxoplasmosis                                                 | 8/129     | 112/8091 | 0.000399 | 0.004266 | 0.003083 | CITTA/BIRC3/HLA-DRA/HLA-DMA/CCR5/MYD88/IL10RA/STAT3                                                                                                  | 8     |
| hsa05164 | Influenza A                                                   | 10/129    | 172/8091 | 0.000403 | 0.004266 | 0.003083 | IFNAR2/CITTA/PIK3CD/IRF9/CCL2/HLA-DRA/HLA-DMA/MYD88/TRAFF3/IRF7                                                                                      | 10    |
| hsa05321 | Inflammatory bowel disease                                    | 6/129     | 65/8091  | 0.000559 | 0.00562  | 0.004061 | IL2RG/HLA-DRA/HLA-DMA/IL12RB1/STAT3/IL4R                                                                                                             | 6     |
| hsa04514 | Cell adhesion molecules                                       | 9/129     | 149/8091 | 0.000599 | 0.005736 | 0.004145 | CTLA4/ICOS/SELL/HLA-DRA/HLA-DMA/ITGAL/PTPRC/SELPLG/CD2                                                                                               | 9     |
| hsa05323 | Rheumatoid arthritis                                          | 7/129     | 93/8091  | 0.000676 | 0.006176 | 0.004463 | CTLA4/CTSL/CCL2/HLA-DRA/HLA-DMA/ITGAL/LTB                                                                                                            | 7     |
| hsa05135 | Yersinia infection                                            | 8/129     | 137/8091 | 0.001504 | 0.013141 | 0.009497 | PIK3CD/AVAV1/CCL2/MYD88/LAT/ARPC1B/LCK/RAC2                                                                                                          | 8     |
| hsa05170 | Human immunodeficiency virus 1 infection                      | 10/129    | 184/8091 | 0.002009 | 0.016327 | 0.0118   | PIK3CD/APOBEC3G/CCR5/MYD88/CD247/TNFRSF1B/CXCR4/CD3D/CD3G/RAC2                                                                                       | 10    |
| hsa05132 | Salmonella infection                                          | 11/129    | 249/8091 | 0.002031 | 0.016327 | 0.0118   | ARHGEF26/DYNLRB2/TUBB6/PIK3CD/NCKAP1L/RHOH/GSDMD/BIRC3/MYD88/PTPRC/ARPC1B                                                                            | 11    |
| hsa00760 | Nicotine and nicotinamide metabolism                          | 4/129     | 35/8091  | 0.002202 | 0.017025 | 0.012304 | NMNAT3/NAMPT/NT5C2/PPN                                                                                                                               | 4     |
| hsa05166 | Human T-cell leukemia virus 1 infection                       | 10/129    | 219/8091 | 0.002549 | 0.018976 | 0.013714 | PIK3CD/IL2RG/HLA-DRA/HLA-DMA/JAK3/E2F3/ITGAL/CD3D/LCK/CD3G                                                                                           | 10    |
| hsa05167 | Kaposi sarcoma-associated herpesvirus infection               | 9/129     | 194/8091 | 0.003748 | 0.026908 | 0.019446 | IFNAR2/PIK3CD/MICB/IRF9/CCR5/E2F3/TRAFF3/IRF7/STAT3                                                                                                  | 9     |
| hsa05150 | Staphylococcus aureus infection                               | 6/129     | 96/8091  | 0.004203 | 0.027974 | 0.020217 | HLA-DRA/HLA-DMA/ITGAL/SELPLG/CFB/PTAFR                                                                                                               | 6     |
| hsa05161 | Hepatitis B                                                   | 8/129     | 162/8091 | 0.004267 | 0.027974 | 0.020217 | PIK3CD/MMP9/JAK3/E2F3/MYD88/TRAFF3/IRF7/STAT3                                                                                                        | 8     |
| hsa04666 | Fc gamma R-mediated phagocytosis                              | 6/129     | 97/8091  | 0.004423 | 0.027974 | 0.020217 | PIK3CD/AVAV1/LAT/PTPRC/ARPC1B/RAC2                                                                                                                   | 6     |
| hsa04664 | Fc epsilon RI signaling pathway                               | 5/129     | 68/8091  | 0.004454 | 0.027974 | 0.020217 | PIK3CD/AVAV1/LAT/ALOX5AP/RAC2                                                                                                                        | 5     |
| hsa04920 | Adipocytokine signaling pathway                               | 5/129     | 69/8091  | 0.004741 | 0.028879 | 0.020871 | PRKAB2/IRS2/TNFRSF1B/PRKQ/STAT3                                                                                                                      | 5     |
| hsa05142 | Chagas disease                                                | 6/129     | 102/8091 | 0.005651 | 0.03341  | 0.024146 | PIK3CD/CCL2/MYD88/CD247/CD3D/CD3G                                                                                                                    | 6     |
| hsa05418 | Fluid shear stress and atherosclerosis                        | 7/129     | 139/8091 | 0.006666 | 0.038281 | 0.027666 | GSTO2/PIK3CD/MMP9/CTSL/CCL2/RAC2/CYBA                                                                                                                | 7     |
| hsa05417 | Lipid and atherosclerosis                                     | 9/129     | 215/8091 | 0.007286 | 0.040683 | 0.029401 | PIK3CD/AVAV1/MMP9/CCL2/MYD88/TRAFF3/IRF7/STAT3/CYBA                                                                                                  | 9     |
| hsa04672 | Intestinal immune network for IgA production                  | 4/129     | 49/8091  | 0.007509 | 0.040792 | 0.029481 | ICOS/HLA-DRA/HLA-DMA/CXCR4                                                                                                                           | 4     |
| hsa04668 | TNF signaling pathway                                         | 6/129     | 112/8091 | 0.008831 | 0.046709 | 0.033757 | PIK3CD/MMP9/CCL2/BIRC3/TRAFF3/TNFRSF1B                                                                                                               | 6     |
| hsa05320 | Autoimmune thyroid disease                                    | 4/129     | 53/8091  | 0.009885 | 0.050944 | 0.036817 | CTLA4/HLA-DRA/HLA-DMA/GZMB                                                                                                                           | 4     |
| hsa04145 | Phagosome                                                     | 7/129     | 152/8091 | 0.010665 | 0.05318  | 0.038434 | TUBB6/CTSL/HLA-DRA/HLA-DMA/CORO1A/CLEC7A/CYBA                                                                                                        | 7     |
| hsa04613 | Neutrophil extracellular trap formation                       | 8/129     | 190/8091 | 0.010848 | 0.05318  | 0.038434 | HDAC11/PIK3CD/GSDMD/ITGAL/SELPLG/RAC2/CLEC7A/CYBA                                                                                                    | 8     |
| hsa05160 | Hepatitis C                                                   | 7/129     | 157/8091 | 0.012592 | 0.060261 | 0.043551 | IFNAR2/PIK3CD/IRF9/E2F3/TRAFF3/IRF7/STAT3                                                                                                            | 7     |
| hsa05416 | Viral myocarditis                                             | 4/129     | 60/8091  | 0.015119 | 0.070674 | 0.051077 | HLA-DRA/HLA-DMA/ITGAL/RAC2                                                                                                                           | 4     |
| hsa05203 | Viral carcinogenesis                                          | 8/129     | 204/8091 | 0.016109 | 0.073589 | 0.053183 | HDAC11/PIK3CD/IRF9/CCR5/JAK3/TRAFF3/IRF7/STAT3                                                                                                       | 8     |
| hsa04068 | FoxO signaling pathway                                        | 6/129     | 131/8091 | 0.01809  | 0.080803 | 0.058396 | PRKAB2/IRS2/PIK3CD/BCL2L11/STAT3/IL7R                                                                                                                | 6     |
| hsa05330 | Allograft rejection                                           | 3/129     | 38/8091  | 0.02255  | 0.097247 | 0.070281 | HLA-DRA/HLA-DMA/GZMB                                                                                                                                 | 3     |
| hsa04810 | Regulation of actin cytoskeleton                              | 8/129     | 218/8091 | 0.023015 | 0.098425 | 0.071132 | PIK3CD/NCKAP1L/AVAV1/FGD3/ITGAL/CXCR4/ARPC1B/RAC2                                                                                                    | 8     |

Table S7.Potential targeted therapeutic drugs for STAT3 in rosacea

| cmap name             | mean   | n | enrichment | p       | specificity | percent non-null |
|-----------------------|--------|---|------------|---------|-------------|------------------|
| naringenin            | -0.286 | 4 | -0.873     | 0.00056 | 0           | 50               |
| ikarugamycin          | -0.507 | 3 | -0.871     | 0.00423 | 0.0152      | 66               |
| levobunolol           | -0.295 | 4 | -0.844     | 0.00105 | 0.0064      | 50               |
| azapropazone          | -0.448 | 3 | -0.837     | 0.00863 | 0           | 66               |
| diphenhydramine       | -0.401 | 5 | -0.818     | 0.00048 | 0           | 60               |
| rifampicin            | -0.264 | 4 | -0.752     | 0.00764 | 0.0357      | 50               |
| Prestwick-1103        | -0.366 | 4 | -0.75      | 0.00784 | 0.0464      | 50               |
| demecarium bromide    | -0.595 | 4 | -0.724     | 0.0118  | 0.0116      | 75               |
| semustine             | 0.554  | 4 | 0.703      | 0.01611 | 0.1412      | 75               |
| terbutaline           | 0.226  | 4 | 0.705      | 0.01574 | 0.0122      | 50               |
| etamsylate            | 0.539  | 4 | 0.71       | 0.01456 | 0.0273      | 75               |
| methacholine chloride | 0.417  | 3 | 0.804      | 0.01508 | 0.0165      | 66               |
| ivermectin            | 0.638  | 5 | 0.81       | 0.0006  | 0.0269      | 80               |
| pyridoxine            | 0.329  | 4 | 0.829      | 0.00127 | 0           | 50               |
| clofibrate            | 0.523  | 2 | 0.851      | 0.04455 | 0.0364      | 100              |
| arachidonic acid      | 0.511  | 3 | 0.855      | 0.00585 | 0           | 100              |
| puromycin             | 0.704  | 4 | 0.873      | 0.00036 | 0.0955      | 100              |
| 5230742               | 0.696  | 2 | 0.945      | 0.00567 | 0.0078      | 100              |
| benfluorex            | 0.767  | 4 | 0.951      | 0       | 0           | 100              |
| rottlerin             | 0.813  | 3 | 0.98       | 0.00004 | 0.0052      | 100              |

Table S8.Potential targeted therapeutic drugs for SBD pattern in rosacea

| cmap name             | mean   | n | enrichment | p       | specificity | percent non-null |
|-----------------------|--------|---|------------|---------|-------------|------------------|
| ikarugamycin          | -0.484 | 3 | -0.865     | 0.00497 | 0.0152      | 66               |
| yohimbic acid         | -0.341 | 3 | -0.863     | 0.00529 | 0.0059      | 66               |
| chenodeoxycholic acid | -0.335 | 4 | -0.796     | 0.00342 | 0.0461      | 50               |
| timolol               | -0.311 | 4 | -0.785     | 0.00434 | 0.0224      | 50               |
| ribavirin             | -0.246 | 4 | -0.76      | 0.00684 | 0.0461      | 50               |
| Prestwick-1103        | -0.313 | 4 | -0.746     | 0.00828 | 0.0464      | 50               |
| indoprofen            | -0.416 | 4 | -0.744     | 0.00849 | 0.04        | 75               |
| heptaminol            | -0.435 | 5 | -0.731     | 0.00284 | 0.0274      | 60               |
| clorsulon             | -0.517 | 4 | -0.717     | 0.01293 | 0.0426      | 75               |
| iopromide             | -0.369 | 4 | -0.71      | 0.01466 | 0.0515      | 75               |
| furazolidone          | -0.316 | 4 | -0.709     | 0.01484 | 0.0255      | 50               |
| cicloheximide         | 0.572  | 4 | 0.704      | 0.01597 | 0.1695      | 75               |
| benfluorex            | 0.536  | 4 | 0.712      | 0.01396 | 0.0349      | 75               |
| glycocholic acid      | 0.441  | 4 | 0.738      | 0.00917 | 0           | 75               |
| albendazole           | 0.41   | 3 | 0.743      | 0.03315 | 0.0523      | 66               |
| ivermectin            | 0.626  | 5 | 0.769      | 0.0014  | 0.0376      | 80               |
| rottlerin             | 0.51   | 3 | 0.79       | 0.01857 | 0.1606      | 66               |
| puromycin             | 0.703  | 4 | 0.871      | 0.00038 | 0.0955      | 100              |
| clofibrate            | 0.551  | 2 | 0.875      | 0.03131 | 0.0303      | 100              |
| 5230742               | 0.656  | 2 | 0.924      | 0.01125 | 0.0078      | 100              |
| 5182598               | 0.727  | 2 | 0.959      | 0.003   | 0.0392      | 100              |
| 5224221               | 0.79   | 2 | 0.976      | 0.00093 | 0.1006      | 100              |
| 5255229               | 0.861  | 2 | 0.995      | 0.00002 | 0           | 100              |
